# Supplementary material
Source: MDPI journal article supplement (https://www.mdpi.com/search?q=resources-07-00010)
Supplement: s001 [file resources-07-00010-s001.pdf]

## Supplementary: Future trajectories of renewable energy consumption in the European Union

Table S1: Gross final energy consumption in the EU 28 – data in ktoe [20]

|                       | 2008    | 2009    | 2010    | 2011    | 2012    | 2013    | 2014    | 2015    |
|-----------------------|---------|---------|---------|---------|---------|---------|---------|---------|
| <b>Austria</b>        | 28,028  | 26,879  | 28,587  | 27,661  | 27,612  | 28,514  | 27,193  | 28,009  |
| <b>Belgium</b>        | 37,719  | 35,572  | 38,292  | 35,635  | 35,702  | 36,967  | 34,699  | 36,272  |
| <b>Bulgaria</b>       | 11,037  | 9,685   | 9,926   | 10,350  | 10,284  | 9732    | 10,026  | 10,543  |
| <b>Croatia</b>        | 7647    | 7429    | 7479    | 7207    | 6897    | 6823    | 6476    | 6834    |
| <b>Cyprus</b>         | 1778    | 1764    | 1748    | 1711    | 1576    | 1456    | 1464    | 1511    |
| <b>Czech Republic</b> | 27,484  | 26,354  | 27,011  | 26,162  | 26,072  | 25,972  | 25,081  | 25,700  |
| <b>Denmark</b>        | 16,619  | 15,940  | 16,769  | 15,900  | 15,341  | 15,165  | 14,521  | 14,986  |
| <b>Estonia</b>        | 3,324   | 3,002   | 3,170   | 3,108   | 3,189   | 3,192   | 3,138   | 3,066   |
| <b>Finland</b>        | 26,744  | 24,888  | 27,388  | 26,094  | 26,306  | 25,799  | 25,671  | 25,290  |
| <b>France</b>         | 162,341 | 155,713 | 161,474 | 149,365 | 154,916 | 158,332 | 146,751 | 150,044 |
| <b>Germany</b>        | 225,197 | 212,476 | 226,702 | 215,790 | 218,997 | 224,341 | 215,060 | 219,775 |
| <b>Greece</b>         | 22,010  | 21,249  | 19,677  | 19,608  | 17,818  | 16,095  | 16,329  | 17,377  |
| <b>Hungary</b>        | 17,687  | 16,991  | 18,128  | 18,144  | 17,086  | 17,187  | 16,956  | 18,090  |
| <b>Ireland</b>        | 13,394  | 12,094  | 12,145  | 11,127  | 10,858  | 10,978  | 10,937  | 11,347  |
| <b>Italy</b>          | 138,778 | 130,810 | 133,320 | 128,212 | 127,052 | 123,869 | 118,595 | 121,705 |
| <b>Latvia</b>         | 4350    | 4235    | 4342    | 4065    | 4220    | 4048    | 4072    | 3971    |
| <b>Lithuania</b>      | 5476    | 4985    | 5069    | 5026    | 5141    | 5010    | 5095    | 5075    |
| <b>Luxembourg</b>     | 4252    | 3946    | 4199    | 4198    | 4102    | 4045    | 3885    | 3821    |
| <b>Malta</b>          | 423     | 412     | 448     | 436     | 460     | 474     | 482     | 507     |
| <b>Netherlands</b>    | 54.367  | 52.274  | 56.099  | 52.272  | 52.233  | 52.311  | 47.582  | 48.777  |
| <b>Poland</b>         | 65.295  | 64.335  | 69.156  | 67.419  | 67.221  | 65.949  | 64.258  | 65.182  |
| <b>Portugal</b>       | 18.882  | 18.649  | 18.587  | 17.786  | 16.508  | 16.351  | 16.213  | 16.401  |
| <b>Romania</b>        | 26.320  | 23.824  | 24.003  | 24.174  | 24.460  | 23.354  | 23.261  | 23.437  |
| <b>Slovakia</b>       | 11.721  | 10.879  | 11.854  | 11.047  | 10.691  | 10.825  | 10.193  | 10.358  |
| <b>Slovenia</b>       | 5463    | 5033    | 5248    | 5224    | 5104    | 4991    | 4785    | 4882    |
| <b>Spain</b>          | 97.779  | 90.672  | 92.257  | 89.414  | 86.032  | 83.636  | 82.351  | 83.452  |
| <b>Sweden</b>         | 34.562  | 33.578  | 36.295  | 34.794  | 34.952  | 34.131  | 33.468  | 33.913  |
| <b>United Kingdom</b> | 147.794 | 137.301 | 143.771 | 131.412 | 135.970 | 136.800 | 129.202 | 131.123 |

Table S2: Gross final renewable energy consumption in the EU 28 – data in ktOE [20]

|                       | 2008   | 2009   | 2010   | 2011   | 2012   | 2013   | 2014   | 2015   |
|-----------------------|--------|--------|--------|--------|--------|--------|--------|--------|
| <b>Austria</b>        | 7881   | 8049   | 8679   | 8454   | 8673   | 9201   | 8910   | 9231   |
| <b>Belgium</b>        | 1357   | 1679   | 2164   | 2241   | 2562   | 2787   | 2770   | 2858   |
| <b>Bulgaria</b>       | 1158   | 1177   | 1397   | 1479   | 1650   | 1846   | 1806   | 1919   |
| <b>Croatia</b>        | 1683   | 1754   | 1878   | 1830   | 1846   | 1914   | 1804   | 1982   |
| <b>Cyprus</b>         | 91     | 99     | 104    | 103    | 107    | 118    | 131    | 142    |
| <b>Czech Republic</b> | 2369   | 2617   | 2843   | 2868   | 3344   | 3596   | 3779   | 3873   |
| <b>Denmark</b>        | 3085   | 3183   | 3714   | 3738   | 3950   | 4150   | 4262   | 4621   |
| <b>Estonia</b>        | 629    | 691    | 780    | 793    | 823    | 818    | 826    | 878    |
| <b>Finland</b>        | 8383   | 7796   | 8880   | 8550   | 9053   | 9458   | 9942   | 9936   |
| <b>France</b>         | 17,971 | 18,902 | 20,224 | 16,629 | 20,762 | 22,250 | 21,568 | 22,782 |
| <b>Germany</b>        | 19,369 | 21,002 | 23,733 | 24,676 | 26,481 | 27,769 | 29,734 | 32,059 |
| <b>Greece</b>         | 1763   | 1802   | 1930   | 2134   | 2397   | 2412   | 2501   | 2683   |
| <b>Hungary</b>        | 1149   | 1360   | 2312   | 2537   | 2652   | 2785   | 2473   | 2617   |
| <b>Ireland</b>        | 547    | 621    | 681    | 734    | 777    | 847    | 947    | 1040   |
| <b>Italy</b>          | 15,948 | 16,712 | 17,362 | 16,515 | 19,618 | 20,737 | 20,245 | 21,286 |
| <b>Latvia</b>         | 1297   | 1453   | 1319   | 1361   | 1508   | 1501   | 1574   | 1491   |
| <b>Lithuania</b>      | 976    | 987    | 996    | 1002   | 1102   | 1137   | 1201   | 1307   |
| <b>Luxembourg</b>     | 120    | 116    | 120    | 121    | 128    | 143    | 175    | 191    |
| <b>Malta</b>          | 1      | 1      | 5      | 8      | 13     | 17     | 23     | 25     |
| <b>Netherlands</b>    | 1970   | 2243   | 2208   | 2365   | 2466   | 2498   | 2639   | 2847   |
| <b>Poland</b>         | 5041   | 5572   | 6399   | 6941   | 7327   | 7497   | 7383   | 7681   |
| <b>Portugal</b>       | 4336   | 4558   | 4496   | 4384   | 4061   | 4204   | 4377   | 4590   |
| <b>Romania</b>        | 5394   | 5415   | 5606   | 5176   | 5587   | 5578   | 5779   | 5809   |
| <b>Slovakia</b>       | 907    | 1019   | 1079   | 1141   | 1115   | 1094   | 1188   | 1334   |
| <b>Slovenia</b>       | 819    | 1014   | 1072   | 1058   | 1063   | 1118   | 1031   | 1072   |
| <b>Spain</b>          | 10,524 | 11,778 | 12,768 | 11,839 | 12,305 | 12,828 | 13,291 | 13,481 |
| <b>Sweden</b>         | 15,647 | 16,183 | 17,143 | 16,946 | 17,873 | 17,738 | 17,576 | 18,288 |
| <b>United Kingdom</b> | 3919   | 4501   | 5261   | 5469   | 6209   | 7831   | 9134   | 10,792 |
